# Supplementary material for: Chemoenzymatic cascade for stilbene production from cinnamic acid catalyzed by ferulic acid decarboxylase and an artificial metathease
Source: Royal Society of Chemistry journal article supplement (doi:10.1039/c9cy01412h), 2019-01-01
Supplement: c9cy01412h1.pdf [file c9cy01412h1.pdf]

## Supporting Information

### Chemoenzymatic cascade for stilbene production from cinnamic acid catalyzed by ferulic acid decarboxylase and an artificial metatase

*M. A. Stephanie Mertens,<sup>‡ [a]</sup> Daniel F. Sauer<sup>‡ [a]</sup> Ulrich Markel,<sup>[a]</sup> Johannes Schiffels,<sup>[a]</sup> Jun Okuda,<sup>\*, [b]</sup>  
and Ulrich Schwaneberg<sup>\*, [a, c]</sup>*

[a] Institute of Biotechnology, RWTH Aachen University, Worringerweg 3, 52074 Aachen, Germany.

[b] Institute of Inorganic Chemistry, RWTH Aachen University, Landoltweg 1, 52074 Aachen, Germany.

[c] DWI-Leibniz Institute for Interactive Materials, Forckenbeckstraße 50, 52056 Aachen, Germany.

#### Table of Contents

|                                                                                                       |    |
|-------------------------------------------------------------------------------------------------------|----|
| <b>Catalyst preparation</b> .....                                                                     | 2  |
| <b>Product analysis</b> .....                                                                         | 2  |
| <b>FDC1 cloning, expression and analytics</b> .....                                                   | 2  |
| Media .....                                                                                           | 2  |
| Cloning .....                                                                                         | 2  |
| Expression .....                                                                                      | 3  |
| Purification of FDC1 .....                                                                            | 4  |
| Determination of FDC1 concentration in cell-free extracts .....                                       | 4  |
| <b>FhuA <math>\Delta</math>CVF<sup>tev</sup> production, extraction, coupling and analytics</b> ..... | 4  |
| Expression and extraction .....                                                                       | 4  |
| Determination of protein concentration .....                                                          | 5  |
| Coupling of Grubbs-Hoveyda type catalyst to FhuA $\Delta$ CVF <sup>tev</sup> .....                    | 5  |
| Determination of coupling efficiency .....                                                            | 5  |
| <b>Procedures for catalysis</b> .....                                                                 | 5  |
| Procedure for decarboxylation .....                                                                   | 5  |
| Procedure for cross-metathesis (CM) .....                                                             | 6  |
| Procedure for concurrent and sequential cascade reaction .....                                        | 6  |
| <b>AquaMet Catalyst</b> .....                                                                         | 6  |
| <b>ICP-AES measurements</b> .....                                                                     | 7  |
| <b>Appendix</b> .....                                                                                 | 8  |
| <b>References</b> .....                                                                               | 10 |

### Catalyst preparation

Coupling of the Grubbs-Hoveyda type catalyst to FhuA  $\Delta$ CVF<sup>tev</sup> was performed under nitrogen in a *MBraun* glovebox using the previously published protocols.<sup>1</sup> Grubbs-Hoveyda type catalyst with maleimide linking unit was prepared as published previously.<sup>1</sup> AquaMet catalyst is commercially available and was used as received.

### Product analysis

GC-FID analyses were performed using a *Shimadzu* GC-2010 device equipped with an Optima 17ms column (CS-Chromatographie). Hydrogen was used as carrier gas. GC-MS analyses were recorded on a *Shimadzu* GCMS-GP2010 Plus machine using the same column as above. Helium was used as the carrier gas.

### FDC1 cloning, expression and analytics

#### Media

All media components were obtained from AppliChem. LB (tryptone 10 g·L<sup>-1</sup>, NaCl 10 g·L<sup>-1</sup>, yeast extract 5 g·L<sup>-1</sup>) and TB (peptone 12 g·L<sup>-1</sup>, yeast extract 24 g·L<sup>-1</sup>, glycerol 4 g·L<sup>-1</sup>, KH<sub>2</sub>PO<sub>4</sub> 2.31 g·L<sup>-1</sup>, K<sub>2</sub>HPO<sub>4</sub> 12.5 g·L<sup>-1</sup>) media were used for cultivation and enzyme production. If required, kanamycin was supplemented at a concentration of 50 mg·L<sup>-1</sup> (LB<sub>Kan</sub>, TB<sub>Kan</sub>).

#### Cloning

Ferulic acid decarboxylase from *Saccharomyces cerevisiae* (FDC1; UniProt Q03034) and a truncated version of phenylacrylic decarboxylase (tPAD1)<sup>2</sup> were ordered as a bicistronic synthetic construct (Thermo Fisher Scientific) with both genes being codon optimized for expression in *E. coli*. Cloning into the pET28a(+) vector was performed by restriction enzyme digestion via *NcoI* and *BamHI*, followed by ligation using T4 DNA ligase (all enzymes from New England Biolabs).

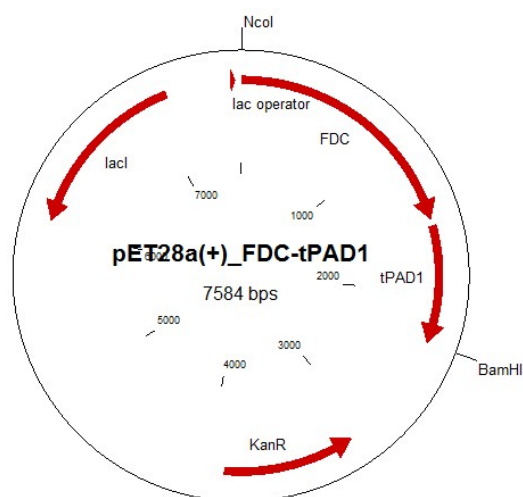

**Figure S1:** Vector map of FDC1-tPAD1 in pET28a(+). The genes FDC1 and tPAD1 consist of 1536 and 729 bps, respectively.

### Expression

FDC1 and tPAD1 from *Saccharomyces cerevisiae* were produced in *E. coli* BL21 Gold (DE3). 5 mL LB<sub>Kan</sub> medium were inoculated from a glycerol stock and incubated at 37 °C, 250 rpm overnight. The preculture was used to inoculate 500 mL TB<sub>Kan</sub> medium. Cells were grown at 30 °C until they reached an OD<sub>600</sub> of 0.8 – 1.0. Then, gene expression was induced by addition of 0.5 mM isopropyl-β-D-thiogalactopyranosid (IPTG). The induction was carried out at 30 °C, 250 rpm for 20 h. Cells were harvested by centrifugation at 3220 g, 4 °C for 20 min. The cell pellet was stored at -20 °C until used.

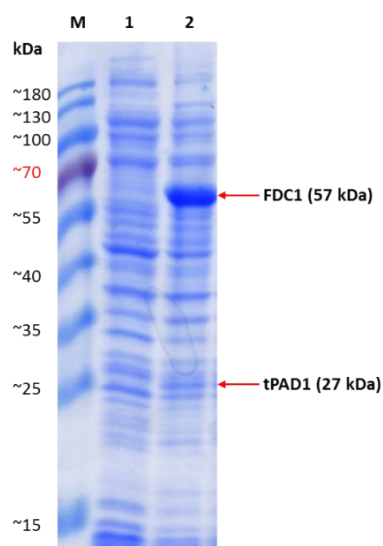

**Figure S2:** SDS-PAGE of FDC1-tPAD1. The molecular weight of FDC1 and tPAD1 is 57 and 27 kDa, respectively. **M** = marker (PageRuler™ Prestained Protein Ladder, 10 to 180 kDa, ThermoFisher); **1** = sample before induction; **2** = sample after induction with 0.5 mM IPTG (20 h).

### Purification of FDC1

FDC1 was purified using a His-Tag column as described by Lin *et al.* with an ÄKTAprime Plus chromatography system (GE Healthcare).<sup>[2]</sup> Protein concentration of the elution fractions was determined by BCA assay and fractions containing high protein amount were pooled and desalted through a HiTrap desalting column (GE Healthcare) into sodium phosphate buffer (100 mM, pH 8.0).

### Determination of FDC1 concentration in cell-free extracts

FDC1 concentration in cell-free extracts was determined using SDS-PAGE. A standard curve was prepared using purified FDC1 in a range from 1 – 40  $\mu$ M. ImageJ 1.52d (Rasband, W.S., U. S. National Institutes of Health, Bethesda, Maryland, USA, <https://imagej.nih.gov/ij/>, 1997-2018) was used to calculate protein concentration.

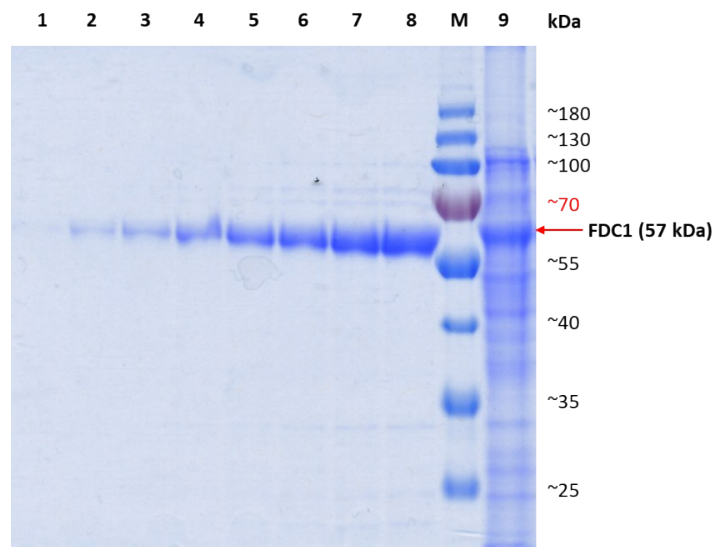

**Figure S3:** SDS-PAGE of FDC1-tPAD1 cell lysate for protein concentration determination. The molecular weight of FDC1 is 57 kDa. **1 – 8** = standard curve (1, 2.5, 5, 10, 15, 20, 30, 40  $\mu$ M). **9** = FDC1-tPAD1 cell lysate. **M** = marker (PageRuler™ Prestained Protein Ladder, 10 to 180 kDa, ThermoFisher).

### FhuA $\Delta$ CVF<sup>tev</sup> production, extraction, coupling and analytics

#### Expression and extraction

Production of FhuA  $\Delta$ CVF<sup>tev</sup> and extraction using SDS were performed as previously described.<sup>1, 3</sup>

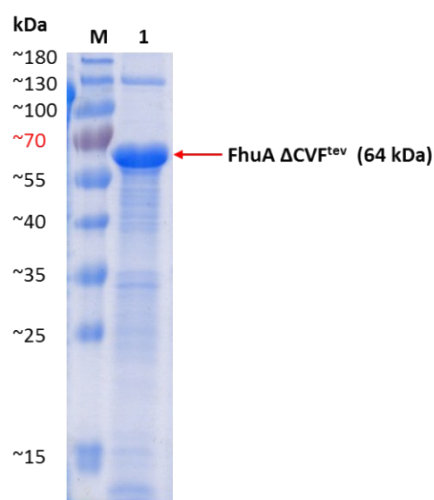

**Figure S4:** SDS-PAGE of FhuA  $\Delta CVF^{tev}$  extraction. The molecular weight of FhuA  $\Delta CVF^{tev}$  is 64 kDa. **M** = marker (PageRuler™ Prestained Protein Ladder, 10 to 180 kDa, ThermoFisher); **1** = FhuA  $\Delta CVF^{tev}$  in 1.25 (w/w)% SDS.

### Determination of protein concentration

The Pierce™ BCA Protein Assay Kit (ThermoFisher Scientific) was used to determine protein concentrations.

### Coupling of Grubbs-Hoveyda type catalyst to FhuA $\Delta CVF^{tev}$

Covalent coupling of the Grubbs-Hoveyda type catalyst to FhuA  $\Delta CVF^{tev}$  was performed as described previously using thiol-ene click reaction.<sup>1</sup>

### Determination of coupling efficiency

Coupling efficiency was determined using the fluorescence dye ThioGlo1® (Berry & Associates) as previously described.<sup>3</sup>

### Procedures for catalysis

#### Procedure for decarboxylation

Cell-free extracts were prepared by sonication and centrifugation (10 min, 15.000 g, 4 °C) of cells harboring FDC1 and tPAD1. For decarboxylation of cinnamic acid derivatives, the substrate was added to a final concentration of 12 mM in sodium phosphate buffer (100 mM, pH 6.0, 137 mM NaCl, 5 (v/v)% THF). Typically, cell-free extracts contained 15  $\mu$ M FDC1 (as determined by quantitative SDS-PAGE analysis; see: Determination of FDC1 concentration in cell-free extracts). The reaction mixture was stirred for 1 h at 35 °C, followed by extraction with dichloromethane (DCM) and analysis by GC-FID.

### Procedure for cross-metathesis (CM)

CM reaction mixtures contained 3 mol % of catalyst and 12 mM substrate in sodium phosphate buffer (100 mM, pH 6.0, 50 mM NaCl, 0.1 (w/w)% SDS). The reaction was run for 4 h at 35 °C, followed by extraction with DCM and analysis by GC-MS-FID.

### Procedure for concurrent and sequential cascade reaction

In the concurrent setup, 15  $\mu$ M FDC1 in cell-free extracts (as determined by quantitative SDS-PAGE analysis; see: Determination of FDC1 concentration in cell-free extracts) and 1 mol % biohybrid catalyst or AquaMet catalyst were used for conversion of 12 mM substrate in 500  $\mu$ L sodium phosphate buffer (100 mM, pH 6.0, 50 mM NaCl, 0.04 (w/w)% SDS, 2 (v/v)% THF). The reaction was run for 4 h at 35 °C.

In sequential cascade reactions, the decarboxylation step was performed as described above. Subsequently, 3 mol % of freshly coupled biohybrid catalyst or AquaMet catalyst were added and the reaction was continued for 4 h at 35 °C.

### AquaMet Catalyst

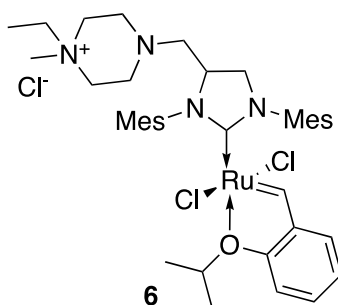

**Figure S4.** Molecular structure of AquaMet catalyst 6.

### ICP-AES measurements

For ICP-AES analysis, the sample was treated with 10 mL aqua regia (3:1 HCl:HNO<sub>3</sub> mixture) under heating (80-100 °C) for 48 h. The resulting mixture was filtered and analyzed. The background was subtracted from the obtained ppm values and the dilution was taken into account.

**Table S1.** Results of the ICP-AES analysis.

| Entry                                                                                                                                                                                                                                                                                                                                                                                                                                                                                | Sample                                                | ppm Ru<br>(measured) | ppm Ru (in the sample) |
|--------------------------------------------------------------------------------------------------------------------------------------------------------------------------------------------------------------------------------------------------------------------------------------------------------------------------------------------------------------------------------------------------------------------------------------------------------------------------------------|-------------------------------------------------------|----------------------|------------------------|
| 1                                                                                                                                                                                                                                                                                                                                                                                                                                                                                    | Aqua regia                                            | 0.139                | -                      |
| 2                                                                                                                                                                                                                                                                                                                                                                                                                                                                                    | Buffer solution containing AquaMet (Table 2, entry 3) | 3.804                | 36.65                  |
| 3                                                                                                                                                                                                                                                                                                                                                                                                                                                                                    | Catalysis with AquaMet (Table 2, entry 3)             | 2.565                | 24.26                  |
| 4                                                                                                                                                                                                                                                                                                                                                                                                                                                                                    | Catalysis with BHC (Table 2, entry 8 or 9)            | 0.242                | 1.03                   |
| <p>Explanation:</p> <p>Entry 1 (Background): Sample of aqua regia as used for dissolving the other samples.</p> <p>Entry 2: Aqueous phase of a reaction mixture containing AquaMet.</p> <p>Entry 3: After catalysis with AquaMet, the aqueous phase was extracted with DCM. The DCM extract was then analyzed by ICP-AES.</p> <p>Entry 4: After catalysis with biohybrid catalyst (BHC). The aqueous phase was extracted with DCM. The DCM extract was then analyzed by ICP-AES.</p> |                                                       |                      |                        |

## Appendix

### Amino acid sequence of FDC1–tPAD1 (*S. cerevisiae*, UniProt Q03034 and P33751)

ATGGGCCATCACCATCATCATCACCGTAAACTGAATCCGGCACTGGAATTCGTGATTTTATTTCAGGTT  
CTGAAAGATGAGGATGACCTGATTGAAATCACCGAAGAAATTGATCCGAATCTGGAAGTTGGTGCCA  
TTATGCGTAAAGCATATGAAAGCCATCTGCCTGCACCGCTGTTTAAAAACCTGAAAGGTGCAAGCAAA  
GACCTGTTTAGCATTCTGGGTTGTCCGGCAGGTCTGCGTAGCAAAGAAAAAGGTGATCATGGTCGTAT  
TGCCCATCATCTGGGTTTAGATCCGAAAACCACCATCAAAGAGATCATCGATTATCTGCTGGAATGCA  
AAGAGAAAGAACCGCTGCCTCCGATTACCGTTCGGTTAGCAGCGCACCGTGTAACCCATATTCTG  
AGCGAAGAAAAAATCCATCTGCAGAGCCTGCCGACACCGTATCTGCATGTTTCAGATGGTGGTAAATA  
TCTGCAGACCTATGGTATGTGGATTCTGCAGACACCGGACAAAAAATGGACCAATTGGAGCATTGCAC  
GTGGTATGGTTGTTGATGATAAACATATTACCGGTCTGGTGATTAAACCGCAGCATATTCGTCAGATT  
GCAGATAGCTGGGCAGCAATTGGTAAAGCCAATGAAATTCGGTTTGCCTGTGTTTTGGTGTTCGCC  
TGCAGCAATTCTGGTGAGCAGCATGCCGATTCCGGAAGGTGTTAGCGAAAGCGATTATGTTGGTGCG  
ATTCTGGGTGAAAGCGTTCGGTGGTTAAATGTGAAACCAATGATCTGATGGTTCGGCAACCAGCG  
AAATGGTTTTTTGAAGGCACCCTGAGCCTGACCGATACACATCTGGAAGGTCCGTTTGGTGAAATGCAT  
GGTTATGTGTTTAAAAGCCAGGGTCATCCGTGTCCGCTGTATACCGTTAAAGCAATGAGCTATCGTGA  
TAATGCAATTCTGCCGGTGAGCAATCCGGGTCTGTGTACCGATGAAACCCATACACTGATTGGTAGCC  
TGGTTGCCACCGAAGCAAAAGAACTGGCAATTGAAAGCGGTCTGCCGATTCTGGATGCATTTATGCC  
GTATGAAGCACAGGCACTGTGGCTGATTCTGAAAGTTGATCTGAAAGGACTGCAGGCACTGAAAACC  
ACACCGGAAGAATTTTGTAAAAAAGTGGGCGATATCTACTTCCGTACCAAAGTTGGTTTTATCGTGCA  
TGAAATTATTCTGGTGGCCGATGATATCGACATCTTCAACTTTAAAGAAGTGATTTGGGCATACGTGA  
CCCGTCATACACCGGTTGCAGATCAGATGGCATTGATGATGTTACCAGCTTTCCGCTGGCACCGTTTG  
TTAGCCAGAGCAGCCGTAGCAAAACAATGAAAGGTGGCAAATGTGTGACCAACTGTATTTTCGTGAG  
CAGTATGAACGCAGCTTCGATTATATCACCTGTAACCTTTGAAAAGGGCTATCCGAAAGGTCTGGTGGA  
TAAAGTTAATGAAAACCTGGAAACGCTACGGCTACAAGTGATAACCCACTAGTAATCATCCGGATAAGT  
GGAATAAAGGAGGTATACCATGCTGCTGTTTCCGCGTCGTACCAATATTGCATTTTCAAACACCG  
GCATCTTTGCAAATTTTCCGCTGCTGGGTGCTACCATTACCACAGTCCGAGCTTTCTGACCCATAAAC  
TGAGCAAAGAAGTTACACGCGCAAGCACCGTCCCTCCGCGTCCGAAACGTATTGTTGTTGCAATTACC  
GGTGCGACCGGTGTTGCACTGGGTATTCGTCTGCTGCAAGTGCTGAAAGAACTGAGCGTGGAACCC  
ATCTGGTTATTAGCAAATGGGGTGCAGCAACCATGAAATATGAAACCGATTGGGAACCGCATGATGT  
TGCAGCACTGGCAACCAAAACCTATAGCGTTCGTGATGTTAGCGCATGTATTAGCAGCGGTAGCTTTC  
AGCATGATGGCATGATTGTTGTTCCGTGTAGCATGAAAAGCCTGGCAGCCATTTCGTATTGGTTTTACC  
GAAGATCTGATTACCCGTGCAGCAGATGTTAGCATTAAAGAAAATCGCAAACCTGCTGCTGGTTACCCG  
TGAAACACCGCTGAGCAGTATTCATCTGGAAAATATGCTGAGCCTGTGTCGTGCCGGTGTATTATCTT



TCCGCCTGTTCCGGCATTATACCCGTCCGAAAAGTCTGCATGACCTGCTGGAACAGAGCGTGGGTC  
GTATTCTGGATTGTTTTGGTATTCATGCCGATACCTTTCCGCGTTGGGAAGGTATTAAGCAAATAA

FDC1 (1<sup>st</sup> gene) and tPAD1 (2<sup>nd</sup> gene), His-Tag marked in bold

Linkerregion underlined, rbs marked in bold

## References

1. F. Philippart, M. Arlt, S. Gotzen, S.-J. Tenne, M. Bocola, H.-H. Chen, L. Zhu, U. Schwaneberg and J. Okuda, *Chem. Eur. J.*, 2013, **19**, 13865 – 13871.
2. F. Lin, K. L. Ferguson, D. R. Boyer, X. N. Lin and E. N. G. Marsh, *ACS Chem. Biol.*, 2015, **10**, 1137-1144.
3. D. F. Sauer, Y. Qu, M. A. S. Mertens, J. Schiffels, T. Polen, U. Schwaneberg and J. Okuda, *Catal. Sci. Technol.*, 2019, **9**, 942-946.
